# Supplementary material for: Theoretical study of the substrate and molecular density effects on molecular self-assembly
Source: Royal Society of Chemistry journal article supplement (doi:10.1039/c9nj04506f), 2019-01-01
Supplement: c9nj04506f1.pdf [file c9nj04506f1.pdf]

**Electronic Supplementary Material (ESI) for New Journal of Chemistry.**

**This journal is © The Royal Society of Chemistry and the Centre  
National de la Recherche Scientifique 2019**

Supplementary Information for

**Theoretical Study of Substrate and Molecular Density  
Effects on Molecular Self-assembly**

**Yuan Qin<sup>a</sup>, Yingying Yang<sup>a</sup>, Yuelin Wang<sup>a</sup>, Xudong Wang<sup>a</sup>,  
Man Yao<sup>a,b\*</sup>**

---

<sup>a</sup> *School of Materials Science and Engineering, Dalian University  
of Technology, Dalian 116024, China. E-mail: [yaoman@dlut.edu.cn](mailto:yaoman@dlut.edu.cn)*

<sup>b</sup> *Key Laboratory of Energy Materials and Devices,  
Liaoning Province, China*

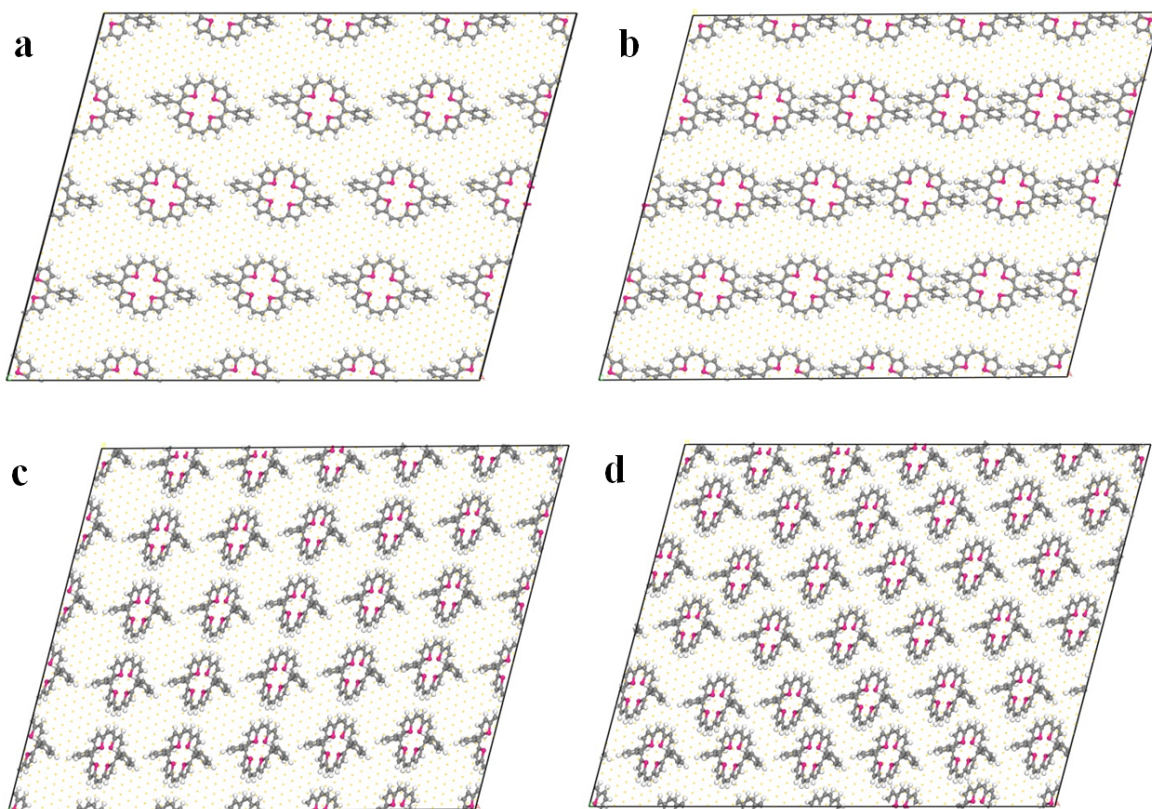

Fig. S1 Self-assembled models of DPTTA molecules with number of (a) 16, (b) 20, (c) 30 and (d) 36 on Au substrate.

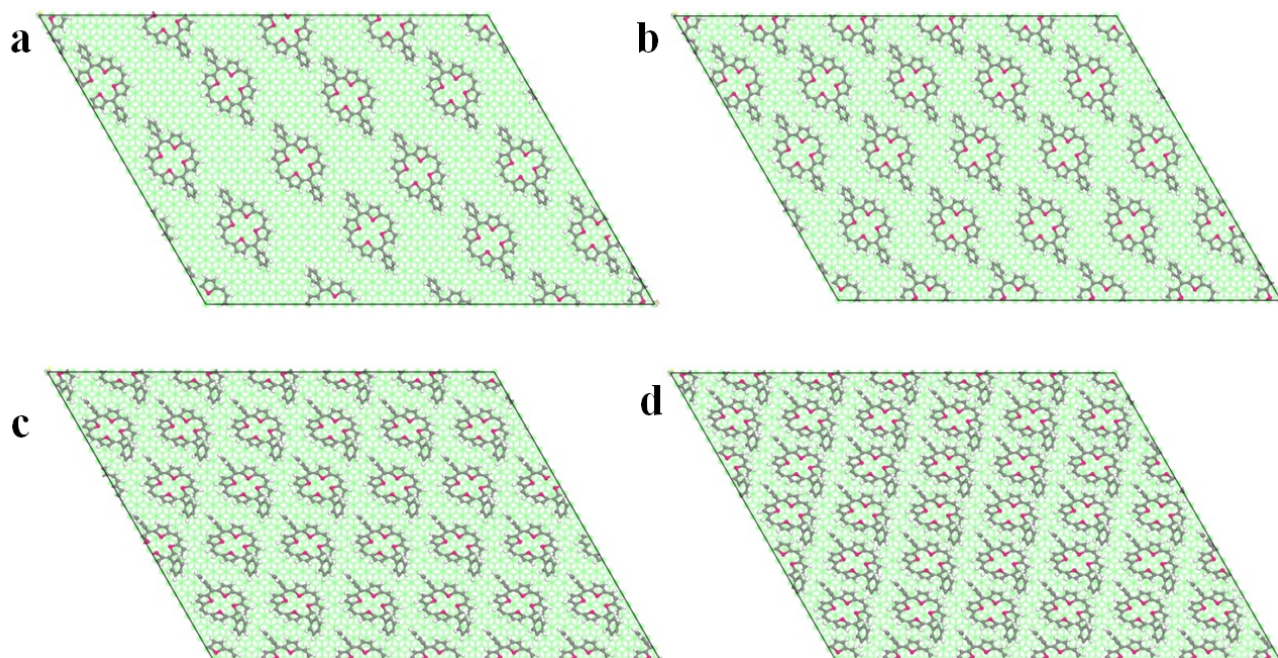

Fig. S2 Self-assembled models of DPTTA molecules with number of (a) 16, (b) 20, (c) 30 and (d) 36 on HOPG substrate.

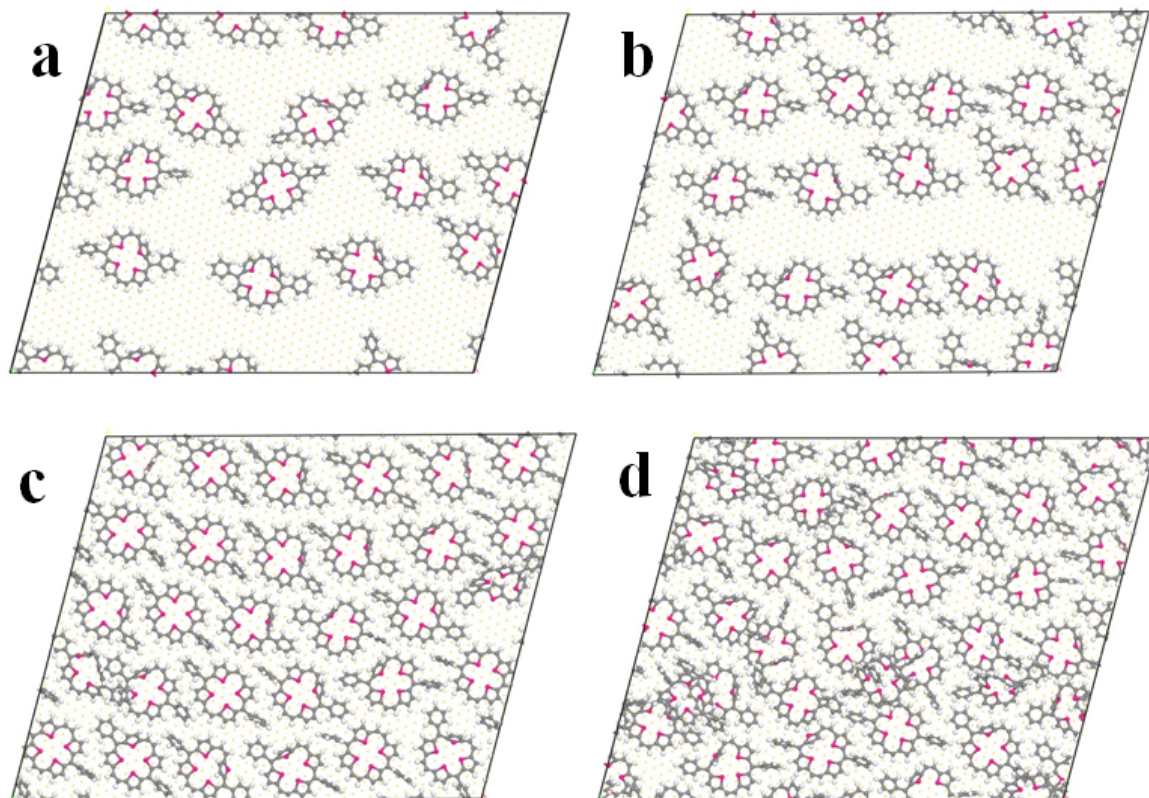

Fig. S3 Snapshots of DPTTA molecules with number of (a) 16, (b) 20, (c) 30 and (d) 36 on Au substrate at 2 ns MD simulation.

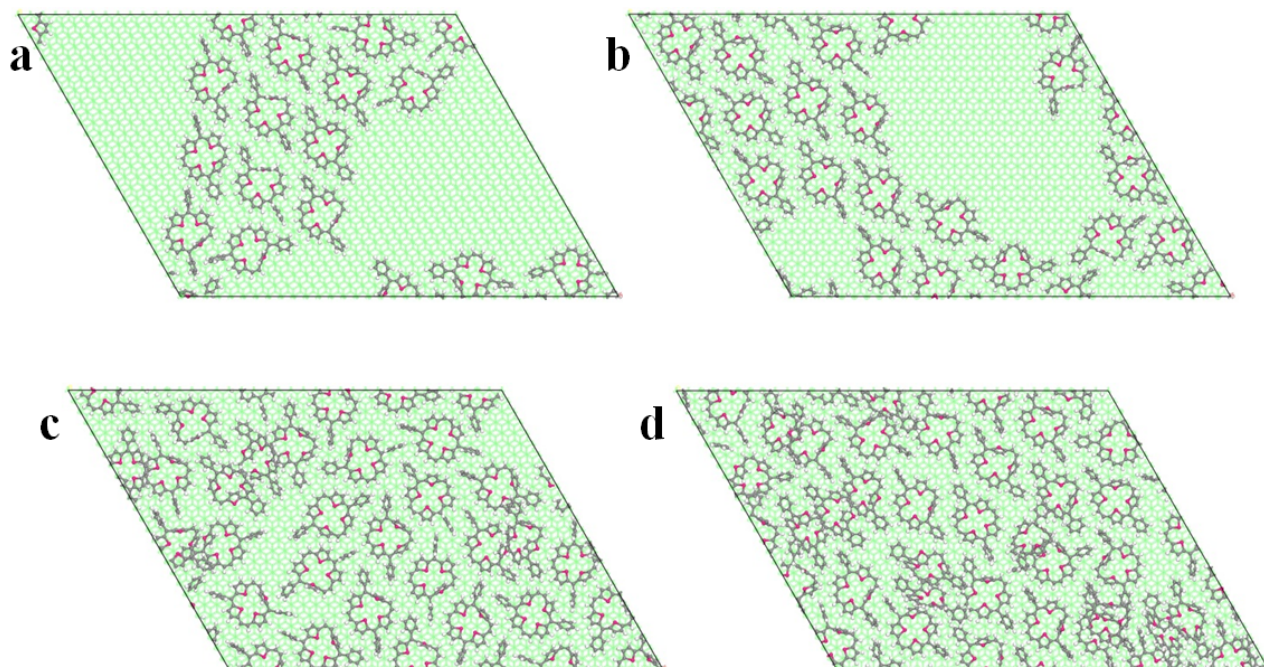

Fig. S4 Snapshots of DPTTA molecules with number of (a) 16, (b) 20, (c) 30 and (d) 36 on HOPG substrate at 2 ns MD simulation.
